# Supplementary material
Source: PubMed Central journal article supplement (PMC1446951)
Supplement: molcellb_26_8_3204__2.pdf [file molcellb_26_8_3204__2.pdf]

Supplementary Table 1. Free T3 and T4 content in serum of 2-week old animals.

|                                     | <b>FT3 pmol/l</b> | <b>FT4 pmol/l</b> |
|-------------------------------------|-------------------|-------------------|
| <b>Pax8 WT</b>                      | 8.3±2             | 25.5±9            |
| <b>Pax8<sup>-/-</sup></b>           | 0.6±0.1           | 1.1±0.4           |
| <b>Pax8<sup>-/-</sup> inj TH 2d</b> | 24.5±3            | 85.7±10           |
| <b>TR WT control</b>                | 8.6±3             | 16.9±8.5          |
| <b>TR WT PTU</b>                    | 4.2±1.3           | 3.5±3.2           |
| <b>TR WT inj TH 6h</b>              | 63±10             | 90.6±14.3         |
| <b>TR WT inj TH 2d</b>              | 29.7±3.5          | 81.55±11          |
| <b>TRα<sup>0/0</sup> control</b>    | 7.5±6             | 14.5±4            |
| <b>TRα<sup>0/0</sup> PTU</b>        | 1.9±2.5           | 6.04±3            |
| <b>TRα<sup>0/0</sup> inj TH 6h</b>  | 40.5±5            | 88.7±15           |
| <b>TRα<sup>0/0</sup> inj TH 2d</b>  | 36.7±3.4          | 75.24±5.7         |
| <b>TRβ<sup>-/-</sup> control</b>    | 19±7              | 57±6              |
| <b>TRβ<sup>-/-</sup> PTU</b>        | 1.5±0.3           | 1.7±0.4           |
| <b>TRβ<sup>-/-</sup> inj TH 6h</b>  | 48.6±3.8          | 85.5±4.8          |
| <b>TRβ<sup>-/-</sup> inj TH 2d</b>  | 42.68±5.7         | 80.34±2.8         |

Values represent Mean ± SD, N=6.

Supplementary Table 2. Free T3 and T4 content in serum of 8-week old animals.

|                                              | <b>FT3 pmol/l</b> | <b>FT4 pmol/l</b> |
|----------------------------------------------|-------------------|-------------------|
| <b>TR WT control</b>                         | 3.6±3             | 12.49±4.2         |
| <b>TR WT PTU</b>                             | 1.2±0.42          | 3.25±5.2          |
| <b>TR WT inj TH 2d</b>                       | 29.7±13.5         | 91.75±22          |
| <b>TR<math>\alpha^{0/0}</math> control</b>   | 4.8±5             | 18.35±3           |
| <b>TR<math>\alpha^{0/0}</math> PTU</b>       | 1.2±0.1           | 6.1±4             |
| <b>TR<math>\alpha^{0/0}</math> inj TH 2d</b> | 43.7±11.4         | 87.5±23.8         |

Values represent Mean  $\pm$  SD, N=2.

Supplementary Table 3. Oligonucleotides used for the real time RT PCR study

| <b>cDNA detected</b> | <b>Nucleotide sequence</b>                              | <b>Fragment length</b> |
|----------------------|---------------------------------------------------------|------------------------|
| β-catenin            | F, 5'-agccgagatggcccagaat<br>R, 5'-aagggaaggttcgaatcaa  | 126                    |
| Cyclin D1            | F, 5'-cagaggcggatgagaacaagt<br>R, 5'-gcgtagcaggagaggaag | 180                    |
| Villin               | F, 5'-tggaggaggaggatgtgttc<br>R, 5'-gggtctcaaggctcggttt | 149                    |
| 36B4                 | F, 5'-acctccttctccaggcttt<br>R, 5'-cccacctgtctccagtcttt | 100                    |

Supplementary Table 4. Oligonucleotides used for the real time PCR study after ChIP assay

| <b>cDNA detected</b> | <b>Nucleotide sequence</b>                                  | <b>Fragment length</b> |
|----------------------|-------------------------------------------------------------|------------------------|
| Catnb1               | F, 5'- atgtgtgctcaggaaaactgg<br>R, 5'- cactagtgatgggcagagac | 236                    |
| Catnb2               | F, 5'-aagtgaggatggggaact<br>R, 5'-gagttgtccctcgggttg        | 328                    |
| Catnb3               | F, 5'- tcttagtgaccctgtgaaa<br>R, 5'- agtcccatcgtcactacagca  | 128                    |
| Catnb4               | F, 5'-ggtgcttagagattgcctgtg<br>R, 5'-aatggatcaggtcatgggttc  | 158                    |
| p36B4                | F, 5'-taaaagatgtccgctctctg<br>R, 5'-tccttcagctcttcttgctc    | 110                    |
| pVillin              | F, 5'-cagacatacatgcaggcaaaa<br>5, 5'-ccagatccctcttcagtgtgt  | 137                    |
